# Supplementary material
Source: PubMed Central journal article supplement (PMC2990130)
Supplement: supp_tpc.109.070821_Supplmental_Data.pdf [file supp_tpc.109.070821_Supplmental_Data.pdf]

**Supplemental Table 1****Primer sequences used for quantitative real-time RT-PCR**

| Acc. NO.      | Forward Sequence (5'→3') | Reverse Sequence (5'→3') | Description                                     |
|---------------|--------------------------|--------------------------|-------------------------------------------------|
| AK108254      | TGCAGTATTTCCACCAACA      | ACATGAACATGGCTGTGGAG     | 10 kDa prolamin                                 |
| AK121775      | CACCAAACCCGATCTTCAGT     | CGGAACAGCTTCTCCATCTC     | 11S globulin                                    |
| AK242306      | CACAGCGCAGTTTGATGTTT     | GCTTGCCGCAATGCTATACT     | 13 kDa prolamin                                 |
| AK242322      | TTGATGCTTGCACCTATGG      | GCAGCTGCTCAGTTTATGCC     | 17 kDa prolamin                                 |
| AK287940      | GCCAGTAATTGCAGGGGATA     | AGGTCACCACCAACGTAAGC     | 19 kDa globulin precursor ( $\alpha$ -globulin) |
| AK100910      | CATCAAGGACGGGAAGGTCA     | ACTTCACTCGGGGAGCTTA      | ADP-glucose pyrophosphorylase large subunit 1   |
| AK071497      | CTGAGGAAGAGGTGCTTTGG     | TCTTTCGGGAGGATTGTGTC     | ADP-glucose pyrophosphorylase large subunit 2   |
| AK069296      | GACCATTTGCGGCAGGAATA     | TGGAACAACCAATACCCAGA     | ADP-glucose pyrophosphorylase large subunit 3   |
| AK121036      | TCCCTTCTGGTTTGTGCATTT    | CCAAAACGTTCTTGCCATGC     | ADP-glucose pyrophosphorylase large subunit 4   |
| AK073146      | AGAATGCTCGTATTGGAGAAAATG | GGCAGCATGGAATAAACCCAC    | ADP-glucose pyrophosphorylase small subunit 1   |
| AK071826      | AGTAGTGGGACTCCGGTCCT     | ATGCCACCTTTTTACCAAG      | ADP-glucose pyrophosphorylase small subunit 2a  |
| AK103906      | AACAATCGAAGCGCGAGAAA     | GCCTGTAGTTGGCACCCAGA     | ADP-glucose pyrophosphorylase small subunit 2b  |
| AK102488      | CCATTTCTCGAGCAACAACA     | ATTTGCAGGGTATCCGTCAC     | Alanine aminotransferase                        |
| *Os02g0255700 | TGAAGTCAAAGAGAATGGAACG   | TACGGCTTAAGGTGTTACCTG    | FLL1                                            |
| *Os07g0422000 | TCAGCATCATCTGAGCAACC     | GCAGCCGATTTAGGTCTTTG     | FLL2                                            |
| *Os04g0645100 | CACACCCTCCAGCAATATCA     | CCTTCTGCGACTGCTTTTCT     | FLO2                                            |
| AK068061      | TCAGCATGCCTACATTACAGC    | TGCAACATCCCGAACAAATA     | Glucose-6-phosphate isomerase A                 |
| AK068236      | GTTGCACGAAGCATCAAAGA     | ATGTTTCGCAACAGCATCAG     | Glucose-6-phosphate isomerase, cytosolic B      |
| AK107343      | GCCAAAGTCAGAGCCAAAAG     | GAACCAATGTGCAACACCAG     | Glutelin B1                                     |
| AK243000      | TGGCGACCATAGCTTTCTCT     | GGGTTGTGCCATGGATTTAC     | Glutelin $\lambda$ -RG21                        |
| AK242245      | CATTGAGCCAATTCGGAGT      | GGCCTGATTGTTGAACTGT      | Glutelin A1                                     |
| AK107314      | GCAAGAGCAGGAACAAGGAC     | CCTCATGGTGAAAAGGTCT      | Glutelin A2                                     |
| AK107271      | TGAAAACCAACCCTGACTCC     | ACTCATCTCCCCTGTTGTGC     | Glutelin A3                                     |
| AK242872      | GCGACCAGAAGGCTACAAAAG    | TTGCTTGTGATCGTTGCTC      | Glutelin B4                                     |
| AK070431      | TCCGAGAGGTTTCAGGTCATC    | ATGAGCTCCTCGGCGTAGTA     | Granule-bound starch synthase I                 |
| AK067654      | AAACGGGCTCTGAAGCAGTA     | CTCCTCCACTTCTTTGCAG      | Granule-bound starch synthase II                |
| AK105347      | ATCGAGAACGGCGAGAAGT      | GGACGGAGATGGTATGGAGA     | Homologue to maize globulin 1                   |
| AK121667      | CGACGAGGTGTTCTACGTCA     | GTGTTGGCGGAGTAGACGAT     | Homologue to maize globulin 2                   |
| AB093426      | TGCTCAGCTACTCCTCCATCATC  | AGGACCGCACAACTTCAACATA   | Isoamylase I                                    |
| AC132483      | TAGAGGTCTCTTGGAGG        | AATCAGCTTCTGAGTCACCG     | Isoamylase II                                   |
| AP005574      | ACAGCTTGAGACTGGGTTGAG    | GCATCAAGAGGACAACCATCTG   | Isoamylase III                                  |
| AK068268      | ACCAGGGCAAGAACATTCAG     | TTGCGTCTTCTGGTACTTG      | Protein disulfide-isomerase precursor           |
| AB012915      | ACTTTCTTCCATGCTGG        | CAAAGGTCTGAAAGATGGG      | Pullulanase                                     |
| AK103898      | CATGCACTGTTTCGAGGAGAA    | GGGAAATGGCTCTCCCTTAG     | Pyruvate, phosphate dikinase 1(OsPPDKB)         |
| AK100267      | CCCTCTGAAAGGAAGTACAGTGT  | GTCCGAAGAATTAGAAGCATTTC  | Actin 1                                         |
| AK242298      | AGGTAGTGATCTCGGCGTTG     | CCGATTCTGGCTGACATAG      | allergen protein RA16                           |
| AK242340      | TTCTCGGTATTGCTCCTCGT     | CTTATTCTGGCCGACATTG      | allergen protein RA17                           |
| AK242333      | TGGCTTCCAACAAGGTAGTG     | ACCTGGTCTTGGTGGTGGTA     | allergen protein RA5B                           |
| AK107328      | AGGTAGTGTCTCGGCGTTG      | GTACATCGGGTAGCCCATTTC    | Seed allergen RAG2 (RA14b)                      |
| AK119436      | GGCATTGCACTCCAAAAGAT     | GCTCCAGTTGTTGCCTTCTC     | Starch branching enzyme I                       |
| AB023498      | GCCAATGCCAGGAAGATGA      | GCGCAACATAGGATGGGTTT     | Starch branching enzyme IIa                     |
| D16201        | ATGCTAGAGTTTGACCGC       | AGTGTGATGGATCCTGCC       | Starch branching enzyme IIb                     |

Supplemental Data. She et al. (2010). Plant Cell 10.1105/tpc.109.070821

|          |                        |                          |                      |
|----------|------------------------|--------------------------|----------------------|
| AK109458 | TCATGGATGTGAAGGAGCAA   | TGGCAGTGAACCACAAACAT     | Starch synthase I    |
| AK101978 | GATCGACCAGGATGACGATT   | GGGTAAAGCACCTGCAACAT     | Starch synthase IIa  |
| AK066446 | CGGAACTACAAGGAGAGCTGGA | GTGCCGCCGTCTCAGCAG       | Starch synthase IIb  |
| AK072339 | CGTGGCCCATTAGATGACTT   | CAGTAAGCAAACGGTCAGCA     | Starch synthase IIc  |
| AK061604 | GCCTGCCTGGACTACATTG    | GCAAACATATGTACACGGTTCTGG | Starch synthase IIIa |
| AK122098 | ATCCGCTCGCAAGAACTGA    | CAACCGCAGGATAACGGAAA     | Starch synthase IIIb |
| AK103906 | GGGAGCGGCTCAAACATAAAA  | CCGTGCACTGACTGCAAAAT     | Starch synthase IVa  |
| AK067577 | GAGCTGCTCCTGCTCAAGAT   | ACACAATTGCACCCTTGACA     | Starch synthase IVb  |
| AK100546 | AATGGTATCCTCCGCAAGTG   | GGCTTGCAATTTCCCTCATAA    | Sucrose synthase 1   |
| AK100334 | GCTGAAGGACAGGAACAAGC   | CACCACAGACAACCACAAGG     | Sucrose synthase 2   |
| AK289078 | CATGTACCCCCTGCTCAACT   | GTCAGCTGTAATGCCTGCAA     | Sucrose synthase 3   |
| AK099330 | CCCAGGAGTACCATGCATCT   | CTTGGTGATGACCCTCTCGT     | $\alpha$ -amylase 3A |
| AK241191 | TCCTTATCGCCTTGCTCTGT   | GAAGCGTCCAGGTCGTAGAG     | $\alpha$ -amylase 3B |
| AK101358 | CTGGCTCCACACAGAACTCA   | CGTAGACATCTCCGTCAGCA     | $\alpha$ -amylase 3C |
| AK119761 | GTCGACGAGAAGGTCATGGT   | CCTTCTCCAGACGCTGTAG      | $\alpha$ -amylase 3D |
| AK064300 | ACAAGGTCATGCAGGGCTAC   | GTTCTTGACCGGATTTCAG      | $\alpha$ -amylase 3E |

Acc. NOs (accession numbers) show the cDNAs registered in the full-length cDNA database. Forward sequences and Reverse sequences show the primer sequence sets to amplify the corresponding genes. Description indicates the annotated names in the database. \*The genes investigated in this study.

**Supplemental Table 2****Markers used for FLO2 mapping****1. Cultivar Specific Markers**

| Marker Name* | Forward Sequence (5'→3') | Reverse Sequence (5'→3') | Discription             |
|--------------|--------------------------|--------------------------|-------------------------|
| 72           | ATGTGTGGTGTTTGAGCATC     | TTCTCGAATGCAATAGCGCC     | Kasalath specific 72cM  |
| 72           | CTGTGTGGTGTTTGTGCACC     | TTCTCGTACGCGATTGCGAC     | Kinmaze specific 72cM   |
| 85           | CCAGGATCTTGGGGCCTTCA     | CTCCGGCTCTCTGTCGTAC      | Kasalath specific 85cM  |
| 85           | CCAGGATCTTGGGGCCTTGA     | CTCCGGCTCTCTACCGTCGC     | Kinmaze specific 85cM   |
| 105          | TCAATCCTATGAAGGACTTT     | ACCAAGTCAAATTAGCCACG     | Kasalath specific 105cM |
| 105          | CTTGTGTTTTTCAATCCTTT     | ACCAAATCAAATTAGCCAAG     | Kinmaze specific 105cM  |
| 106          | ACCGTTGACTTTTTAGCACA     | TAAGACCGACGGACAAACGT     | Kasalath specific 106cM |
| 106          | ACCGTTAACTTTTTAGCATA     | CCGTGCTAACGTTTGACTGT     | Kinmaze specific 106cM  |
| 109          | TACTGGTGCAGTGGTGCT       | ATGGGAGCCTGTCAGACA       | Kasalath specific 109cM |
| 109          | ACCACGTGATGTGAAGAA       | ATGGGAGCCTGTCAGAGA       | Kinmaze specific 109cM  |

\*Numbers in primer name means approximate distance (cM) at chorosome 4

**2. Markers for Fine Mapping**

| Marker Name | Forward Sequence (5'→3')  | Reverse Sequence (5'→3') | Restriction Enzyme* |
|-------------|---------------------------|--------------------------|---------------------|
| 218187      | GAACATCCCAGAAGCGAGTG      | GCTCAAGCTCCTCGTCAACT     |                     |
| 218244      | GGTCGAATGGTGGTGATAGG      | GCGTATCGATCTGGGTTAGC     |                     |
| 217951      | CTAGCATGCGAAACAGGACA      | TGGATTTCAATGACACGTAGG    | AvaII               |
| 218042      | GGAAGGGTAAAGGGCAGAAG      | CGCCAACCCTATCTCATCAC     | HinfI               |
| 218345      | TGACACTTATTAGTTGTCCCTGTGA | TGTTTGCCACAAATCAATCA     |                     |
| 218767      | CTGGGCATACCTTCCAAAGA      | CGTCTGGTCCACTTGGTTTT     | AluI                |
| 218787      | TGTGGACCCAGTCAAAACAA      | TTGCATGTCGTAGGCTTGAG     | RsaI                |
| 218801      | TTCGCAATCTTATGAAACAAGG    | GGATCGCTTTTCACGTTTTC     |                     |
| 218567      | GCGTGTTGAATTGTTGATGG      | CGAATCGAGCCAAGGATAAG     |                     |

\*Restriction enzyme that needed to distinguish polymorphism is showing aside

**Supplemental Table 3**

## Primer sequences used for yeast two-hybrid experiments

| Primer Name       | Sequence                       | Vector Constructed |
|-------------------|--------------------------------|--------------------|
| FLO2-Head- BamHI  | GGGATCCCTGTTGGGTTTGGAGCTTCA    | Both               |
| FLO2-Head- Sall   | ATAGTCGACTTGATGATTCTAATAAGTTT  | pGBKT7 (bait)      |
| FLO2-Head- XhoI   | GCTCGAGTTGATGATTCTAATAAGTTT    | pGADT7 (prey)      |
| FLO2-Middle-BamHI | AGGATCCTTGTCAACTCAGACATCGCT    | Both               |
| FLO2-Middle-Sall  | ATAGTCGACGAGATCCTATGTCGTGCTCA  | pGBKT7 (bait)      |
| FLO2-Middle-XhoI  | GCTCGAGGAGATCCTATGTCGTGCTCA    | pGADT7 (prey)      |
| FLO2-Tail-BamHI   | AGGATCCAGATGGCTTTGGATAAAGGA    | Both               |
| FLO2-Tail-Sall    | ATAGTCGACAGCTGACAGAAGTGCAAATT  | pGBKT7 (bait)      |
| FLO2-Tail-XhoI    | GCTCGAGCGATACCTTTCTTCCAAA      | pGADT7 (prey)      |
| bHLH-A-Prey       | TGAATTCATGTCGAGCTTGATGGACAA    | pGADT7 (prey)      |
| bHLH-B-Prey       | CGGATCCTTAGAACATGTCCTTGAGTG    | pGADT7 (prey)      |
| LEA-A-Prey        | GGTGAGGGTGGAAATTCATGGCGAAGGTGC | pGADT7 (prey)      |
| LEA-B-Prey        | CCCGGATCCTCACCTCTCCATCTCGGTCTC | pGADT7 (prey)      |
| bHLH-A-Bait       | TGAATTCATGCAGGTCAAGGCCATG      | pGBKT7 (bait)      |
| bHLH-B-Bait       | ACCTAGGCCTCACCTCTCCATCTCGGT    | pGBKT7 (bait)      |
| LEA-A-Bait        | TGAATTCATGTCGAGCTTGATGGACAA    | pGBKT7 (bait)      |
| LEA-B-Bait        | CGGATCCTTAGAACATGTCCTTGAGTG    | pGBKT7 (bait)      |
